# Supplementary material
Source: PubMed Central journal article supplement (PMC8244667)
Supplement: 41436_2021_1249_MOESM1_ESM.pdf [file 41436_2021_1249_MOESM1_ESM.pdf]

# SUPPLEMENTARY FIGURE S1

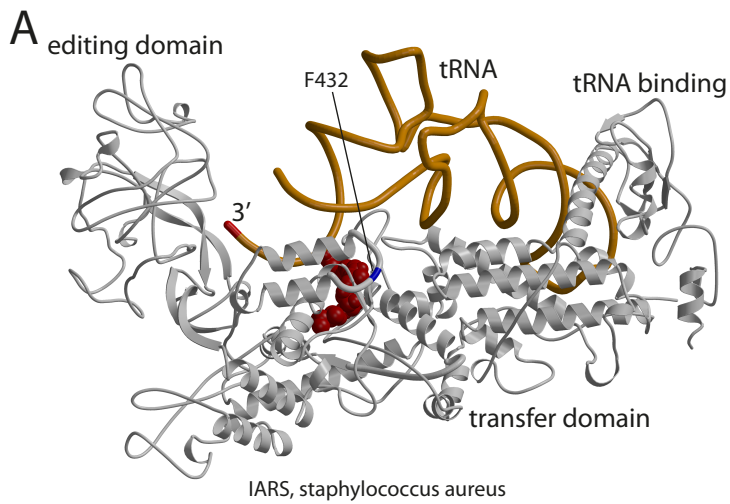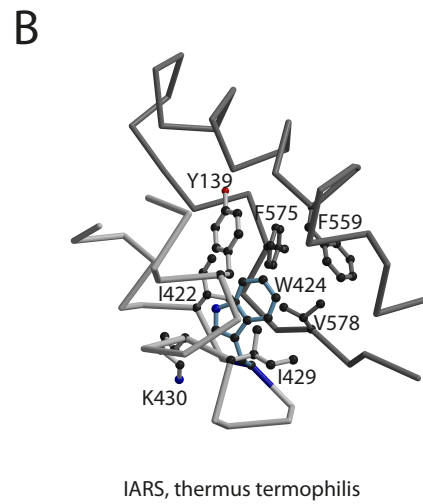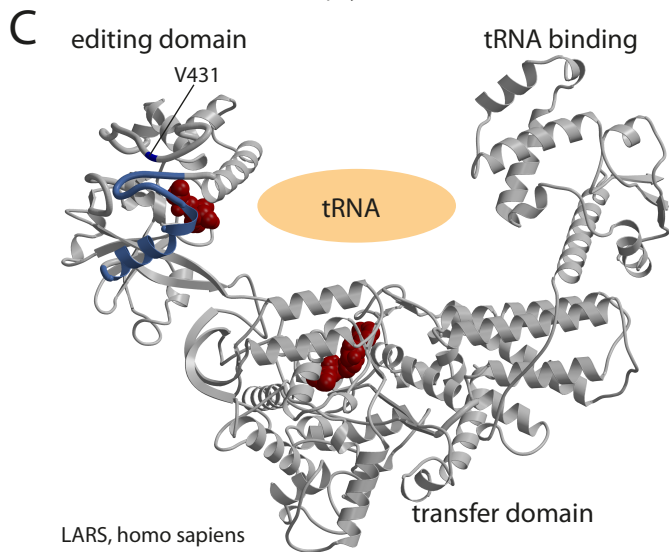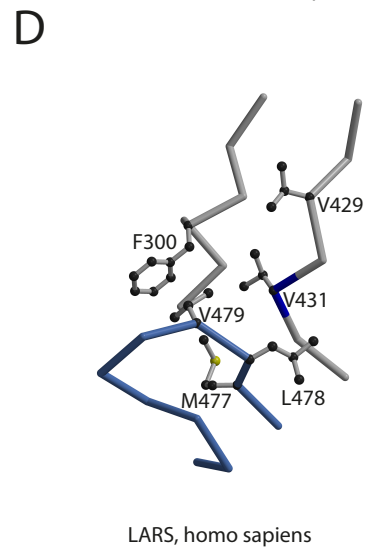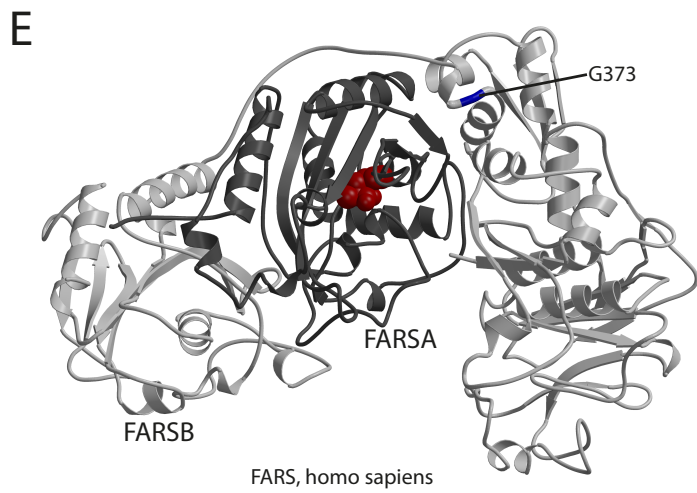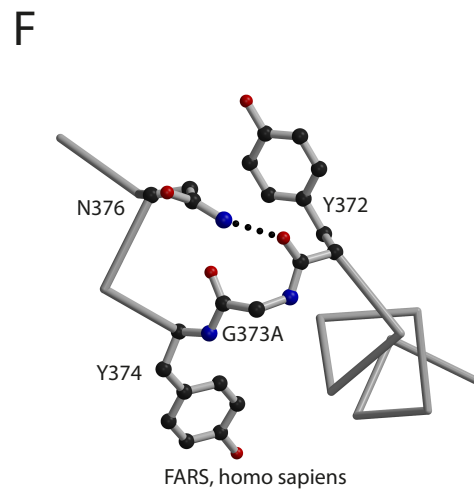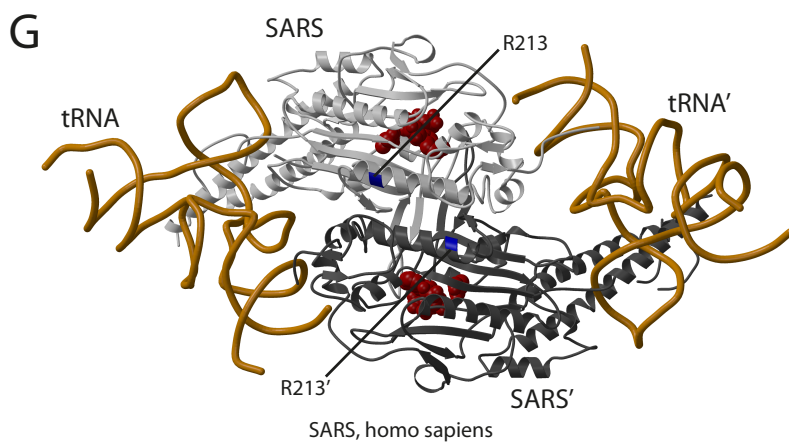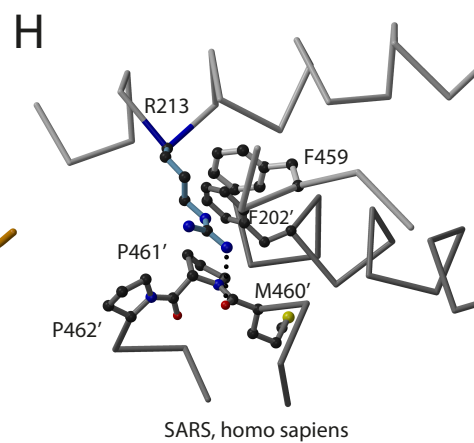

# SUPPLEMENTARY FIGURE S2

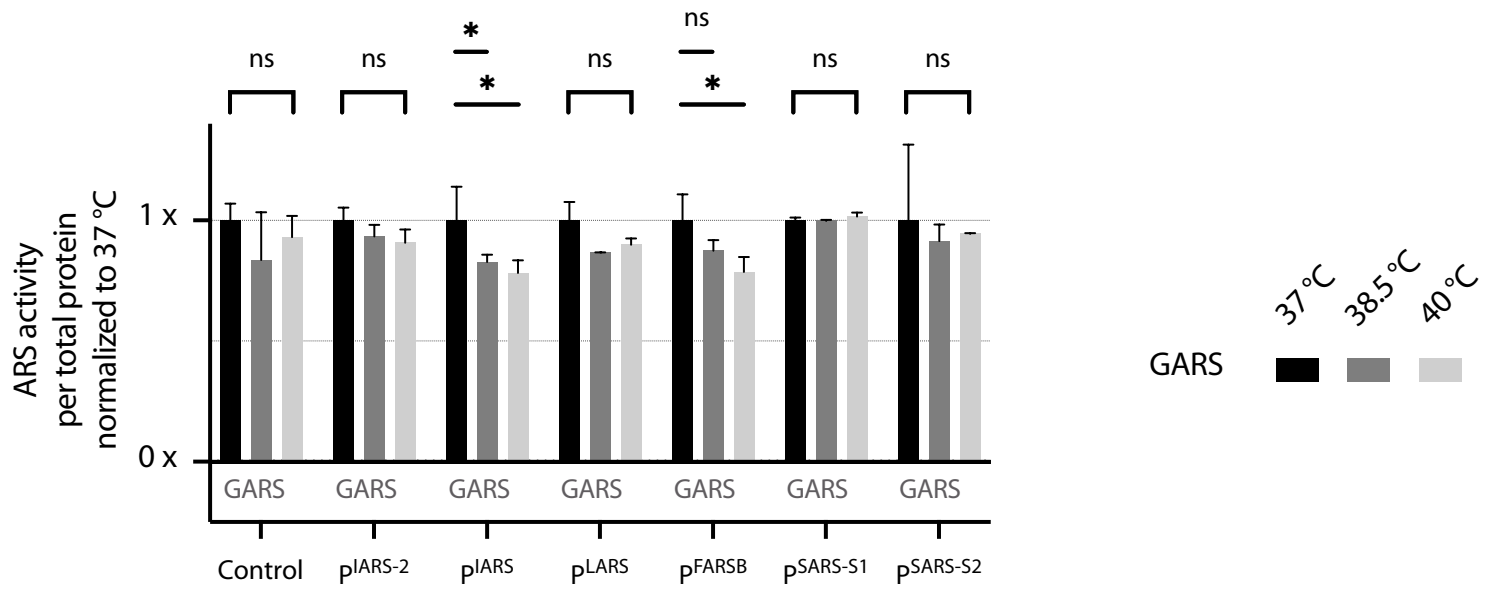

# SUPPLEMENTARY FIGURE S3

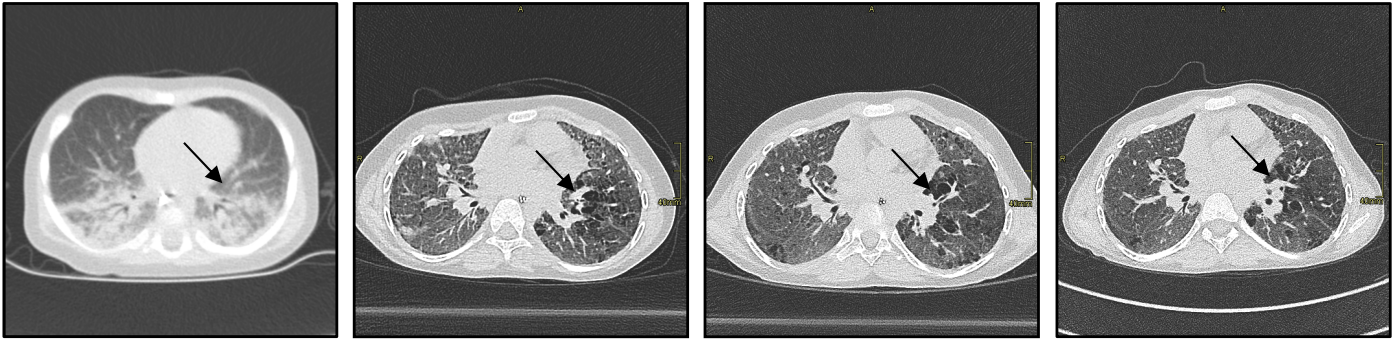

3 months

5 years and 6 months  
T = 0, start treatment

6 years and 6 months  
T = 12 months

7 years and 6 months  
T = 24 months
